# Supplementary material for: Altitude and life‐history shape the evolution of Heliconius wings
Source: PubMed Central journal article supplement (PMC6916360; doi:10.1111/evo.13865), 2019-11-06
Supplement: EVO-73-2436-s001.pdf [file EVO-73-2436-s001.pdf]

## Supplementary Materials

**Table S1** Study species summary data. Sample sizes (N) and wing parameters for the 13 study species, ordered phylogenetically based on the most recent *Heliconius* phylogeny (Kozak et al. 2015). Male ratio refers to proportion of males in the sample.

| Species              | N    | Area mean (mm <sup>2</sup> ) | Area S.E. | Aspect ratio mean | Aspect ratio S.E. | Alt. mean (m.a.s.l.) | N <sub>male</sub> | N <sub>female</sub> | Male ratio |
|----------------------|------|------------------------------|-----------|-------------------|-------------------|----------------------|-------------------|---------------------|------------|
| <i>H. telesiphe</i>  | 48   | 519.4                        | 8.9       | 2.35              | 0.009             | 1302                 | 40                | 8                   | 0.83       |
| <i>H. clysonymus</i> | 57   | 537.3                        | 8.4       | 2.31              | 0.012             | 1346                 | 40                | 17                  | 0.70       |
| <i>H. erato</i>      | 1687 | 465.8                        | 1.5       | 2.09              | 0.002             | 700                  | 1202              | 447                 | 0.73       |
| <i>H. eleuchia</i>   | 102  | 500.6                        | 8.6       | 2.03              | 0.007             | 1408                 | 72                | 30                  | 0.71       |
| <i>H. sara</i>       | 225  | 387.2                        | 2.9       | 2.17              | 0.006             | 420                  | 164               | 61                  | 0.73       |
| <i>H. xanthocles</i> | 36   | 514.6                        | 10.3      | 2.04              | 0.009             | 1044                 | 20                | 8                   | 0.71       |
| <i>H. hierax</i>     | 37   | 512.1                        | 8.3       | 2.08              | 0.008             | 1364                 | 29                | 8                   | 0.78       |
| <i>H. doris</i>      | 42   | 547.5                        | 7.1       | 2.30              | 0.012             | 444                  | 34                | 7                   | 0.83       |
| <i>H. timareta</i>   | 195  | 606.7                        | 3.1       | 2.05              | 0.004             | 883                  | 163               | 32                  | 0.84       |
| <i>H. cydno</i>      | 127  | 575.1                        | 5.5       | 2.09              | 0.007             | 844                  | 112               | 15                  | 0.88       |
| <i>H. melpomene</i>  | 867  | 533.3                        | 1.9       | 2.05              | 0.002             | 789                  | 683               | 159                 | 0.81       |
| <i>H. numata</i>     | 44   | 611.6                        | 12.9      | 2.11              | 0.013             | 561                  | 30                | 14                  | 0.68       |
| <i>H. wallacei</i>   | 48   | 526.3                        | 8.2       | 2.18              | 0.011             | 290                  | 37                | 11                  | 0.77       |

7  
8

9  
10  
11  
12  
13

**Table S2.** Study species sexual dimorphism. Sexual size dimorphism (SSD) and sexual shape dimorphism (SShD) two-sample t-tests summary statistics. Positive t-values indicate smaller or longer-winged (higher aspect ratio) males (Fig. 2, main text).

| Species              | SSD<br>t-value | SSD<br>d.f. | SSD<br>p-value | SShD<br>t-value | SShD<br>d.f. | SShD<br>p-value |
|----------------------|----------------|-------------|----------------|-----------------|--------------|-----------------|
| <i>H. telesiphe</i>  | 2.57           | 10          | <0.05*         | -0.5            | 10           | ns              |
| <i>H. clysonymus</i> | 1.98           | 24          | 0.06•          | -1.5            | 39           | ns              |
| <i>H. erato</i>      | 3.30           | 802         | <0.001***      | 10.4            | 843          | <0.001***       |
| <i>H. eleuchia</i>   | -2.61          | 61          | <0.01**        | -2.3            | 48           | <0.05*          |
| <i>H. sara</i>       | -2.45          | 108         | <0.05*         | -0.6            | 100          | ns              |
| <i>H. xanthocles</i> | -0.08          | 13          | ns             | 0.5             | 13           | ns              |
| <i>H. hierax</i>     | -0.50          | 8           | ns             | 0.5             | 16           | ns              |
| <i>H. doris</i>      | -1.92          | 9           | 0.08•          | 1.4             | 11           | ns              |
| <i>H. timareta</i>   | 2.03           | 49          | 0.05•          | -0.2            | 46           | ns              |
| <i>H. cydno</i>      | 0.57           | 18          | ns             | 0.1             | 16           | ns              |
| <i>H. melpomene</i>  | 5.54           | 240         | <0.001***      | 1.6             | 230          | ns              |
| <i>H. numata</i>     | 2.57           | 24          | <0.05*         | -0.9            | 33           | ns              |
| <i>H. wallacei</i>   | -1.31          | 16          | ns             | 2.2             | 19           | <0.05*          |

14

15 **Table S3.** Weighted PGLS model selection table for species sexual size dimorphism  
 16 (SSD), mean wing aspect ratio and mean wing area based on AICc. All models have  
 17 the species phylogeny as correlation structure and are weighted for mean trait/fixed  
 18 effects variance and sample size.

19

---

**Size sexual dimorphism (SSD)**

---

Minimal model     $\text{sisd.raw} \sim 1$   
 Maximal model     $\text{sisd.raw} \sim \text{larva} + \text{shape.mean} + \text{shsd.raw} + \text{size.mean} + \text{clade}$   
 Final model         $\text{sisd.raw} \sim \text{larva} + \text{shsd.raw} + \text{shape.mean}$

| Step          | Df | Resid. Dev. | AICc  |
|---------------|----|-------------|-------|
| Initial model | 6  | 73.7        | 109.8 |
| -clade        | 7  | 73.46       | 99.5  |
| -size.mean    | 8  | 75.6        | 93.7  |

20

---

**Wing area (size)**

---

Minimal model     $\text{area.mean} \sim 1$   
 Maximal model     $\text{area.mean} \sim \text{shape.mean} * \text{sex.ratio} + \text{alt.mean} * \text{dist.Eq}$   
 Final model         $\text{area.mean} \sim \text{sex.ratio} + \text{alt.mean} + \text{dist.Eq} + \text{alt.mean} * \text{lat.mean}$

| Step                  | Df | Resid. Dev. | AICc  |
|-----------------------|----|-------------|-------|
| Initial model         | 6  | 129.5       | 165.9 |
| -shape.mean*sex.ratio | 6  | 126.0       | 162.4 |
| -shape.mean           | 7  | 126.0       | 152.0 |

21

22

---

**Wing aspect ratio (shape)**

---

Minimal model     $\text{shape.mean} \sim 1$   
 Maximal model     $\text{shape.mean} \sim \text{size.mean} * \text{sex.ratio} + \text{alt.mean} * \text{dist.Eq}$   
 Final model         $\text{shape.mean} \sim \text{sex.ratio} + \text{alt.mean} + \text{dist.Eq}$

| Step                 | Df | Resid. Dev. | AICc |
|----------------------|----|-------------|------|
| Initial model        | 5  | -20.4       | 31.6 |
| alt.mean*lat.mean    | 6  | -19.3       | 17.1 |
| - alt.mean*size.mean | 7  | -17.8       | 8.2  |
| - size.mean          | 8  | -17.3       | 1.3  |

23  
 24

25 **Table S4.** Phylogenetic Generalised Least Squares full model summaries for sexual  
 26 size dimorphism, wing shape and wing size. Correlation structures of the models are  
 27 shown in the third column. Dist. Eq.= distance from Equator, SD= sexual  
 28 dimorphism.  
 29

| Response variable (wing trait) | Model type  | Corr. structure                           | Fixed effects      | Estimate | SE     | t-value | p-value   | d.f. (d.f. res.) |
|--------------------------------|-------------|-------------------------------------------|--------------------|----------|--------|---------|-----------|------------------|
| Size Sexual Dimorphism         | PGLS (nmle) | Phylogeny, sample size                    | (Intercept)        | -31.8    | 21.4   | -1.5    | 0.08      | 13 (9)           |
|                                |             |                                           | Solitary larvae    | -15.8    | 3.0    | -5.3    | 0.0004*** |                  |
|                                |             |                                           | Shape sex dim.     | 1.8      | 1.3    | 1.5     | 0.2       |                  |
|                                |             |                                           | Shape mean         | 17.8     | 10.3   | 1.8     | 0.1       |                  |
| Aspect ratio                   | PGLS (nmle) | Phylogeny, intra-sp variance, sample size | (Intercept)        | 1.93     | 0.23   | 8.36    | 0.00      | 13 (9)           |
|                                |             |                                           | Altitude           | -1.5E-4  | 6.3E-5 | -2.4    | 0.04*     |                  |
|                                |             |                                           | Dist. Eq           | -4.6E-2  | 1.7E-2 | -2.7    | 0.02*     |                  |
|                                |             |                                           | Sex ratio          | 0.70     | 0.28   | 2.5     | 0.03*     |                  |
| Area                           | PGLS (nmle) | Phylogeny, intra-sp variance, sample size | (Intercept)        | 474.52   | 75.37  | 6.30    | 0.00      | 13 (8)           |
|                                |             |                                           | Altitude           | 0.16     | 0.04   | 3.47    | 0.008**   |                  |
|                                |             |                                           | Sex ratio          | -161.75  | 73.97  | -2.19   | 0.06      |                  |
|                                |             |                                           | Dist. Eq.          | 77.21    | 16.91  | 4.57    | 0.002**   |                  |
|                                |             |                                           | Altitude* Dist. Eq | -0.07    | 0.02   | -4.66   | 0.002**   |                  |

30

31

32 **Table S5.** Model selection based on AIC of within species variation in wing aspect  
 33 ratio and wing area of *H. erato* and *H. melpomene*.  
 34

---

**A) Aspect ratio, *H. erato***

---

Minimal model aspect.ratio ~ 1  
 Maximal model aspect.ratio ~ area.mm2 \* altitude + dist.Eq. + longitude + sex  
 Final model aspect.ratio ~ area.mm2 \* altitude + longitude + sex

| Step          | Res.<br>Df | Res. Dev. | AIC   |
|---------------|------------|-----------|-------|
| Initial model | 1294       | 4.92      | -7246 |
| - dist.Eq.    | 1295       | 4.92      | -7248 |

---

**B) Aspect ratio, *H. melpomene***

---

Minimal model aspect.ratio ~ 1  
 Maximal model aspect.ratio ~ area.mm2 \* altitude + dist.Eq. + longitude + sex  
 Final model aspect.ratio ~ area.mm2 \* altitude + longitude + sex

| Step          | Res.<br>Df | Res. Dev. | AIC   |
|---------------|------------|-----------|-------|
| Initial model | 704        | 2.3       | -4070 |
| - dist.Eq.    | 705        | 2.3       | -4072 |

---

**C) Wing area, *H. erato***

---

Minimal model area ~ 1  
 Maximal model area ~ aspect.ratio \* altitude + dist.Eq + longitude + sex  
 Final model area ~ aspect.ratio \* altitude + dist.Eq + longitude + sex

| Step          | Res.<br>Df | Res. Dev. | AIC   |
|---------------|------------|-----------|-------|
| Initial model | 1294       | 4841609   | 10720 |

---

**D) Wing area, *H. melpomene***

---

Minimal model area ~ 1  
 Maximal model area ~ aspect.ratio \* altitude + dist.Eq + longitude + sex  
 Final model area ~ aspect.ratio \* altitude + dist.Eq + longitude + sex

| Step          | Res.<br>Df | Res. Dev. | AIC  |
|---------------|------------|-----------|------|
| Initial model | 704        | 2092210   | 5701 |

39  
40  
41  
42  
43

**Table S6.** Full model output table for within-species (*H. erato* and *H. melpomene*) analyses of wing aspect ratio and wing area. Relative R<sup>2</sup> per fixed effect estimated with the package *relaimpo* (Grömping 2006) and the *lmg* statistic.

| Trait (response) | Sp.             | Fixed effects | Res. d.f. | Estimate | SE      | t-value | p-value | Rel. R <sup>2</sup> |
|------------------|-----------------|---------------|-----------|----------|---------|---------|---------|---------------------|
| Aspect ratio     | <i>H. era.</i>  | (intercept)   | 1295      | 2.2      | 0.03    | 75.57   | 0.00    |                     |
|                  |                 | altitude      |           | -1.6E-04 | 0.00    | -6.50   | 0.00*** | 0.43                |
|                  |                 | sex(female)   |           | -3.4E-02 | 0.01    | -2.87   | 0.004** | 0.37                |
|                  |                 | area          |           | -1.8E-04 | 0.00    | -3.73   | 0.00*** | 0.14                |
|                  |                 | longitude     |           | 4.9E-04  | 0.00    | 2.00    | 0.05    | 0.05                |
|                  |                 | area*alt.     |           | 2.9E-07  | 0.00    | 5.30    | 0.00*** | 0.02                |
|                  | <i>H. melp.</i> | (intercept)   | 705       | 2.3E+00  | 4.2E-02 | 55.08   | 0.00    |                     |
|                  |                 | altitude      |           | -1.4E-04 | 3.4E-05 | -4.17   | 0.00*** | 0.50                |
|                  |                 | area          |           | -3.4E-04 | 6.1E-05 | -5.63   | 0.00*** | 0.23                |
|                  |                 | area*alt.     |           | 2.2E-07  | 6.4E-08 | 3.40    | 0.001** | 0.10                |
|                  |                 | longitude     |           | 6.6E-04  | 2.6E-04 | 2.53    | 0.012*  | 0.09                |
|                  |                 | sex(female)   |           | -4.0E-02 | 1.3E-02 | -3.16   | 0.001** | 0.08                |
|                  |                 | sex(male)     |           | -3.1E-02 | 1.2E-02 | -2.65   | 0.008** | (0.08)              |
| Wing area        | <i>H. era.</i>  | (intercept)   | 1294      | 879      | 102.27  | 8.60    | 0.00    |                     |
|                  |                 | AR*alt.       |           | 0.25     | 0.05    | 4.80    | 0.00*** | 0.38                |
|                  |                 | longitude     |           | 0.87     | 0.25    | 3.54    | 0.00*** | 0.18                |
|                  |                 | sex(female)   |           | -19.3    | 11.90   | -1.62   | 0.1     | 0.16                |
|                  |                 | sex(male)     |           | -6.76    | 11.64   | -0.58   | 0.56    | 0.15                |
|                  |                 | dist.Eq.      |           | -2.35    | 0.84    | -2.80   | 0.005** | (0.15)              |
|                  |                 | altitude      |           | -0.53    | 0.11    | -4.88   | 0.00*** | 0.08                |
|                  |                 | aspect.ratio  |           | -161     | 47.56   | -3.40   | 0.00*** | 0.05                |
|                  | <i>H. melp.</i> | (intercept)   | 704       | 1430     | 131.35  | 10.89   | 0.00    |                     |
|                  |                 | dist.Eq.      |           | -5.51    | 0.86    | -6.38   | 0.00*** | 0.33                |
|                  |                 | longitude     |           | 1.51     | 0.24    | 6.21    | 0.00*** | 0.18                |
|                  |                 | sex(female)   |           | -39.5    | 12.13   | -3.26   | 0.001** | 0.18                |
|                  |                 | sex(male)     |           | -13.8    | 11.39   | -1.21   | 0.23    | (0.18)              |
|                  |                 | aspect.ratio  |           | -365     | 61.86   | -5.91   | 0.00*** | 0.15                |
|                  |                 |               |           |          |         |         |         |                     |
|                  |                 | AR*alt.       |           | 0.25     | 0.06    | 3.95    | 0.00*** | 0.10                |
|                  |                 | altitude      |           | -0.51    | 0.13    | -3.92   | 0.00*** | 0.05                |

44  
45

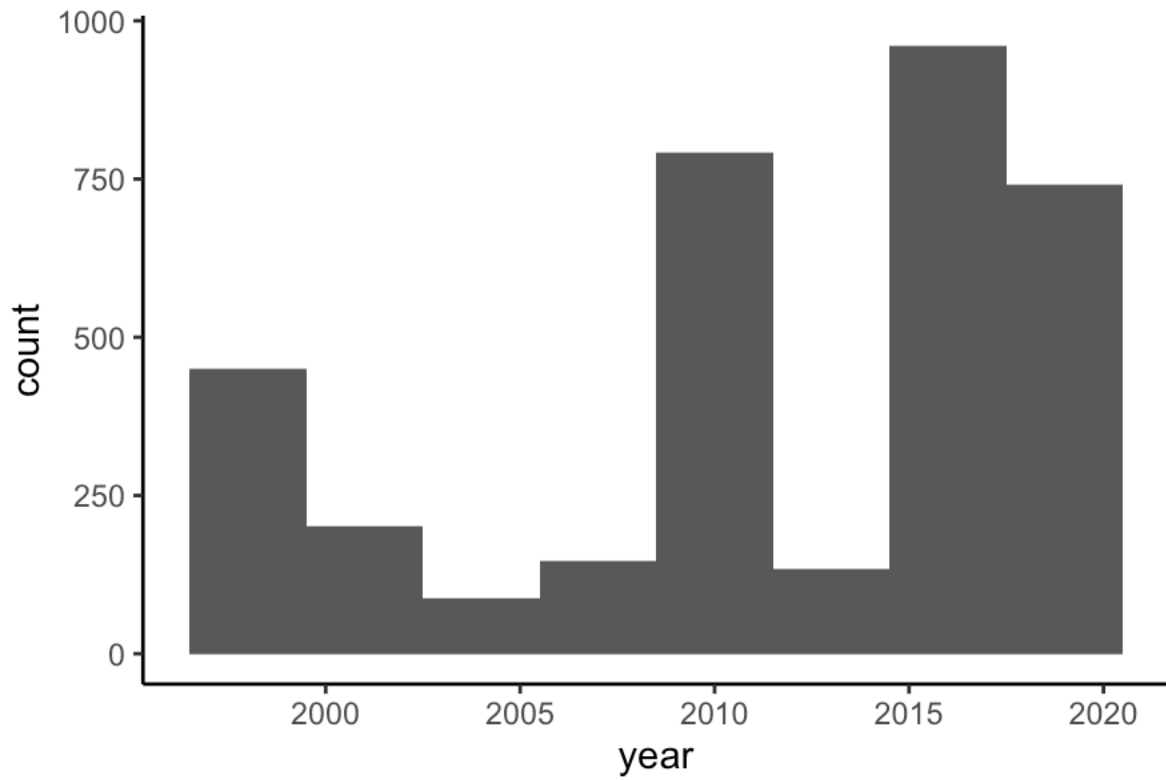

46  
47  
48  
49  
50

**Figure S1.** Number of *Heliconius* individuals in this study collected across 3-year intervals.

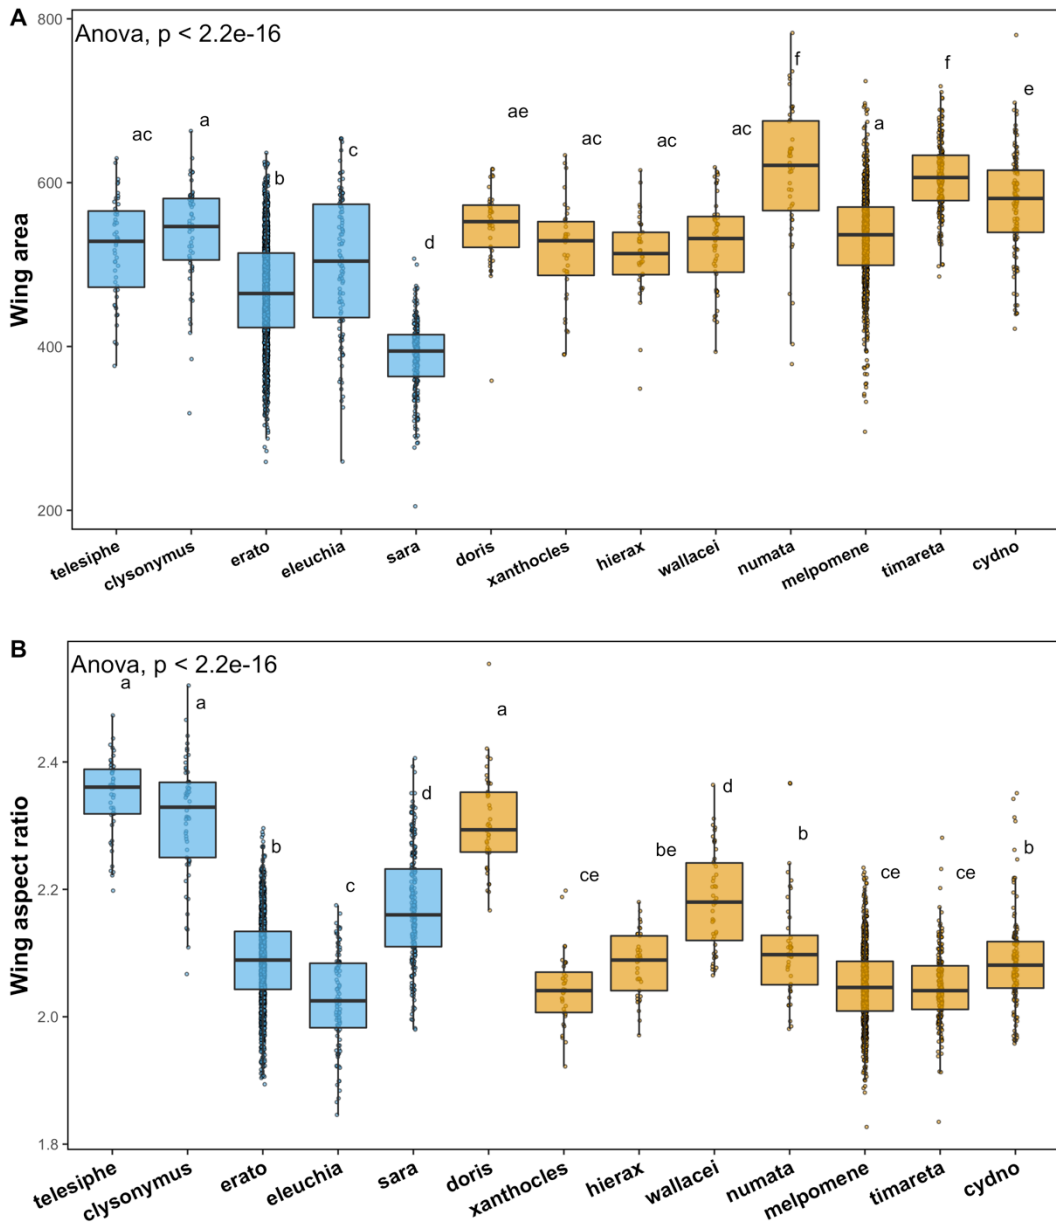

51  
52  
53  
54  
55  
56

**Figure S2.** Wing area ( $\text{mm}^2$ , A) and wing aspect ratio (wing roundness, B) variation across species. Species sharing a letter are not significantly different (Tukey-adjusted comparisons). Species are ordered phylogenetically (for phylogeny see Fig. 3) and coloured by the two major clades.



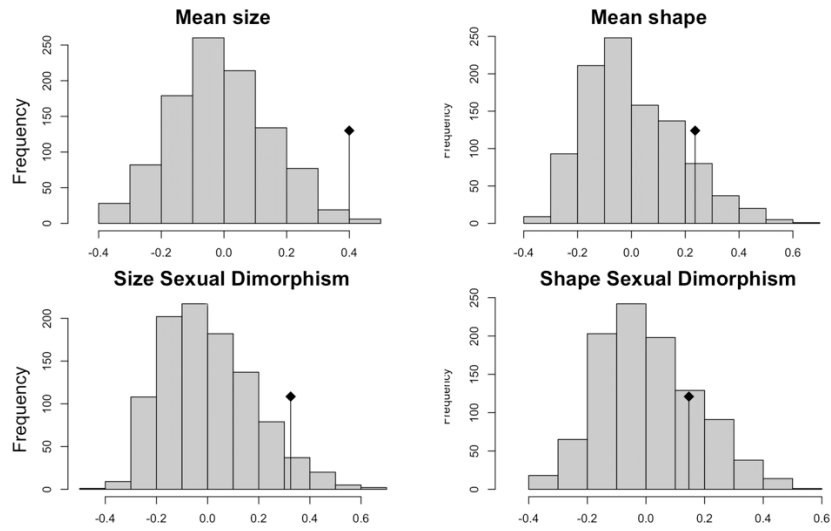

57  
58  
59  
60  
61  
62  
63  
64  
65  
66

**Figure S3.** Abouheif C-mean distribution plots for six variables. Black dots depicts the observed C-mean statistic relative to the null hypothesis of randomisations along the tips of the phylogeny.

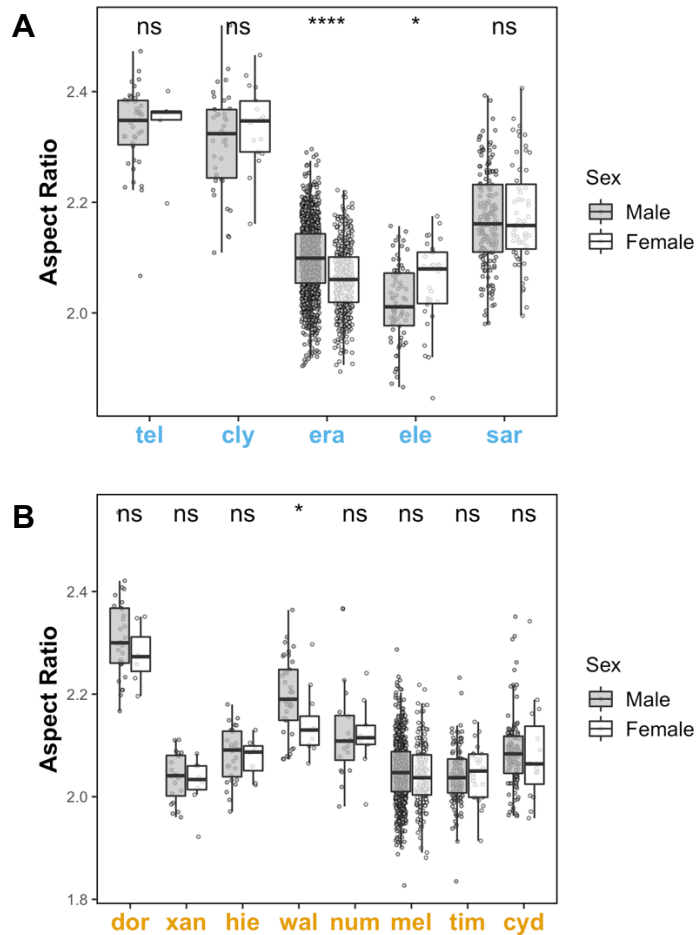

67  
68 **Figure S4.** Sexual wing aspect ratio dimorphism across species of the erato clade  
69 (A) and the melpomene clade (B). Wing aspect ratio differences between males  
70 (grey) and females (white). Error bars represent 95% confidence intervals of the  
71 means. Stars represent significance levels of two sample t-tests between female and  
72 male wing areas for each species ( $\bullet < 0.08$ ,  $* < 0.05$ ,  $** < 0.01$ ,  $*** < 0.001$ ), for full t-tests  
73 output see Table S2.

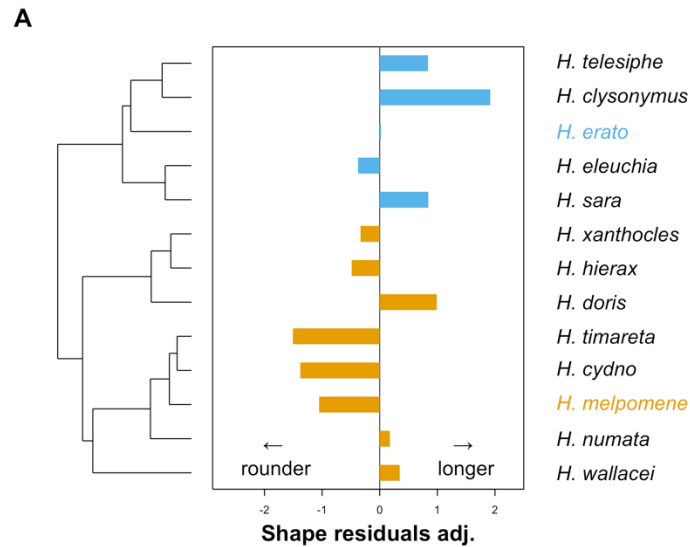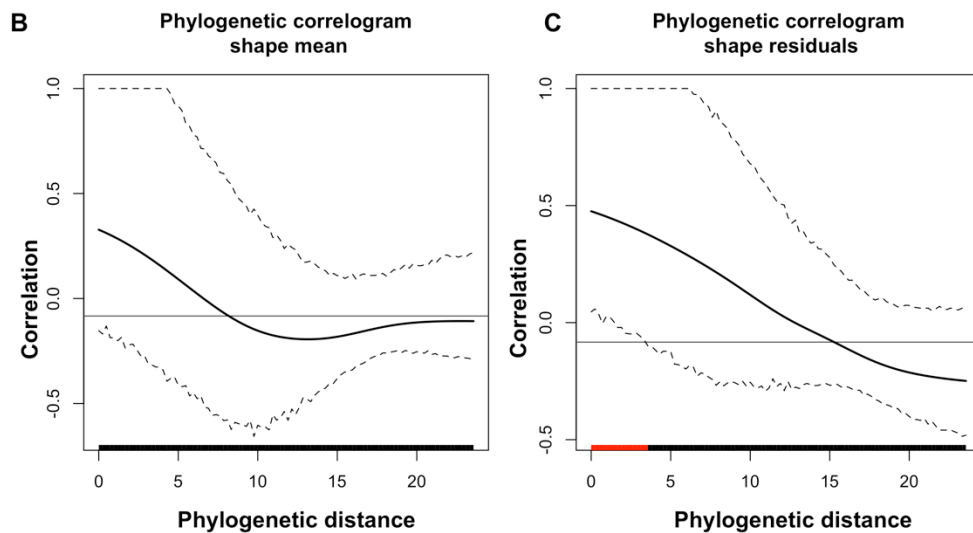

75  
76  
77  
78  
79  
80  
81  
82  
83  
84  
85  
86  
87  
88

**Figure S5.** Phylogenetic signal in wing shape. A) Z-transformed wing shape residuals across the *Heliconius* phylogeny. B) phylogenetic correlogram of species mean wing shape. C) phylogenetic correlogram of species wing shape model residuals. The solid black line represents Moran's I index of autocorrelation and the dashed black lines represent the lower and upper bounds of the confidence 95% confidence interval. The horizontal black line represents the expected value of Moran's I under the null hypothesis of no phylogenetic autocorrelation. The coloured bars in the x-axes show whether the autocorrelation is significant (based on the confidence interval): red for significant positive autocorrelation and black for nonsignificant autocorrelation. All figures were obtained with the package phylosignal (Keck et al. 2016).

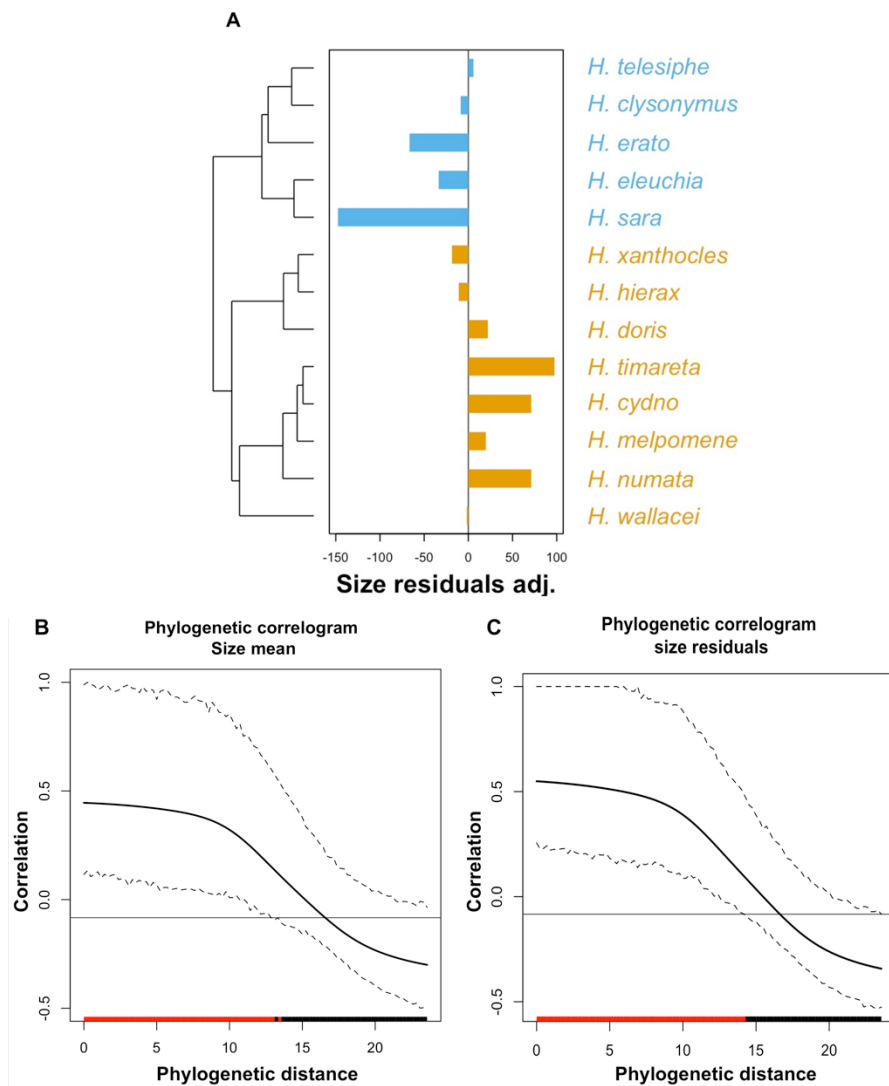

**Figure S6.** Phylogenetic signal in wing size. A) Centered wing size residuals across the *Heliconius* phylogeny. B) phylogenetic correlogram of species mean wing size. C) phylogenetic correlogram of species wing size model residuals. The solid black line represents Moran's I index of autocorrelation and the dashed black lines represent the lower and upper bounds of the confidence 95% confidence interval. The horizontal black line represents the expected value of Moran's I under the null hypothesis of no phylogenetic autocorrelation. The coloured bars in the x-axes show whether the autocorrelation is significant (based on the confidence interval): red for significant positive autocorrelation and black for nonsignificant autocorrelation.

89  
 90  
 91  
 92  
 93  
 94  
 95  
 96  
 97  
 98  
 99  
 100  
 101

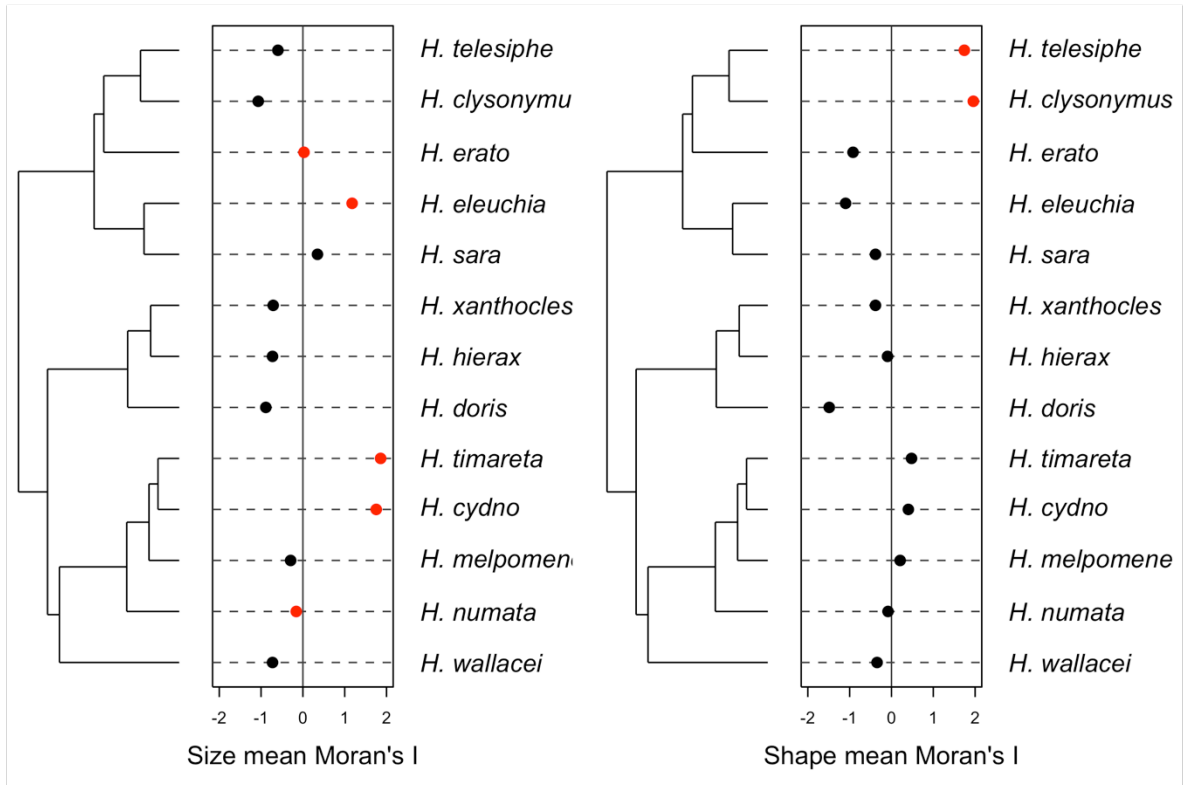

102  
 103  
 104  
 105  
 106  
 107  
 108

**Figure S7.** Local Moran's I index values for each species for wing area mean (left) and wing aspect ratio mean (right). Red points indicate significant positive autocorrelation in mean traits among neighbours in the phylogeny. Estimated and plotted with the package *phylosignal* (Keck et al. 2016).

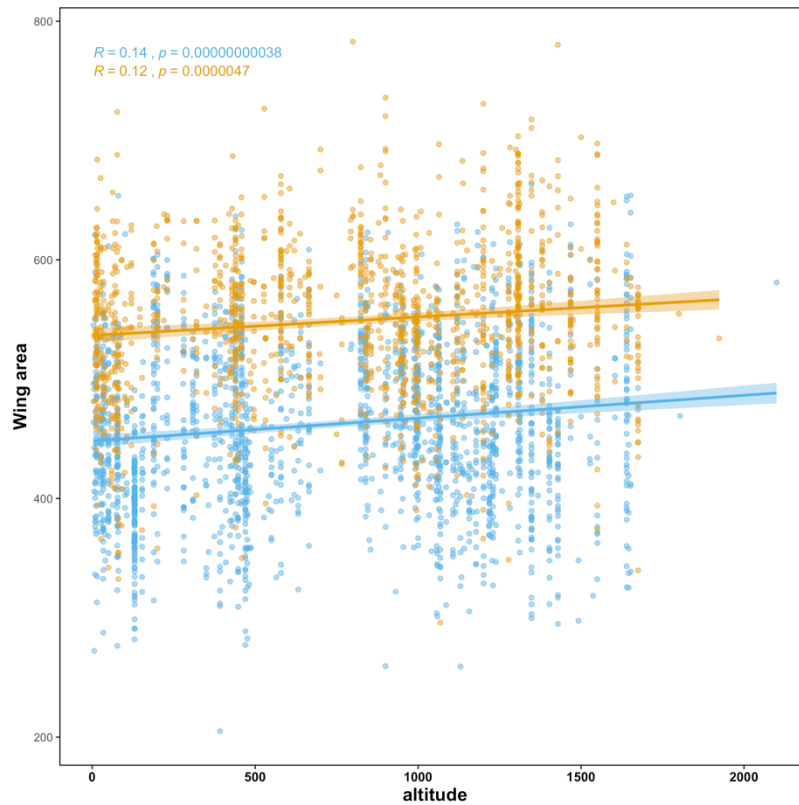

109  
110  
111  
112  
113  
114  
115  
116

**Figure S8.** Wing area variation with altitude across individuals from all species of the erato clade (blue) and the melpomene clade (orange). Each point represents an individual. Lines show best linear fit and are colored by clade. Shaded areas show confidence bands at 1 standard error. Pearson correlation coefficients and p-values are shown for each regression plotted.

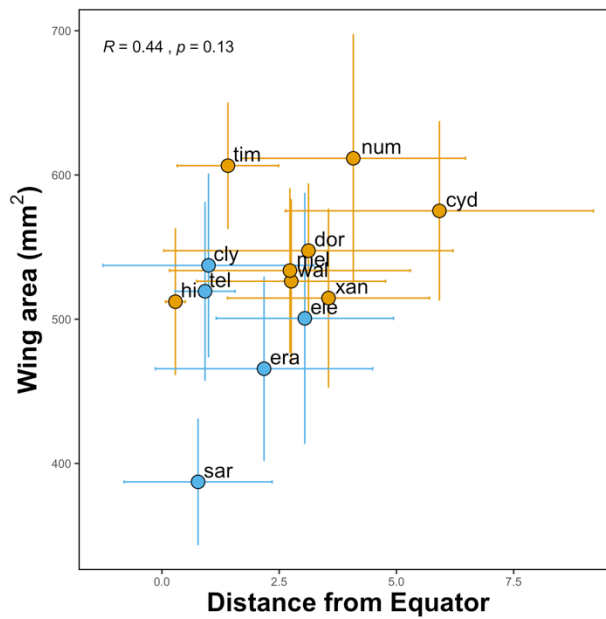

118

119

120

121

122

123

124

125

126

**Figure S9.** Species variation in wing area. Plot shows the correlation between distance from the Equator (degrees) and species mean wing area (mm<sup>2</sup>). Points represent species mean raw values per species. Horizontal and vertical lines show standard error for species mean distance from Equator and mean wing area, respectively. The point labels correspond to the first three characters of the following *Heliconius* species: *H. telesiphe*, *H. clysonymus*, *H. erato*, *H. eleuchia*, *H. sara*, *H. doris*, *H. xanthocles*, *H. hierax*, *amH. wallacei*, *H. numata*, *H. melpomene*, *H. timareta*, *H. cydno*.

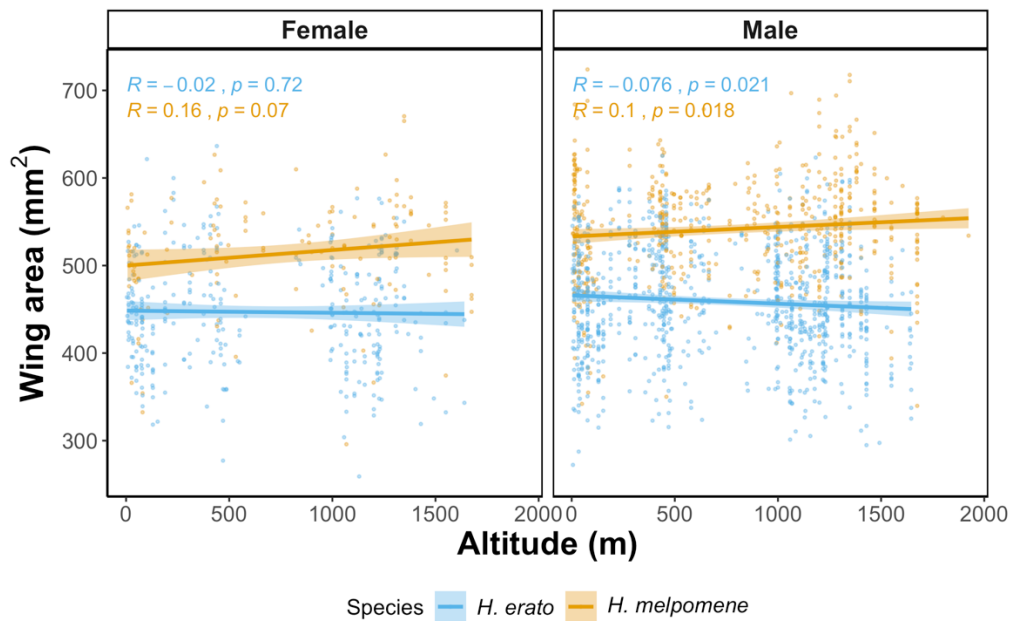

128

129

130 **Figure S10.** Within-species variation in wing area (mm<sup>2</sup>) across alt.s in *H. erato*  
 131 (*H. erato* (blue) and *H. melpomene* (orange), females (left) and males (right). Lines show best  
 132 linear fit and are colored by species. Shaded areas show confidence bands at 1  
 133 standard error. Pearson correlation coefficients and p-values are shown for each  
 134 regression plotted.

134

135

136

137



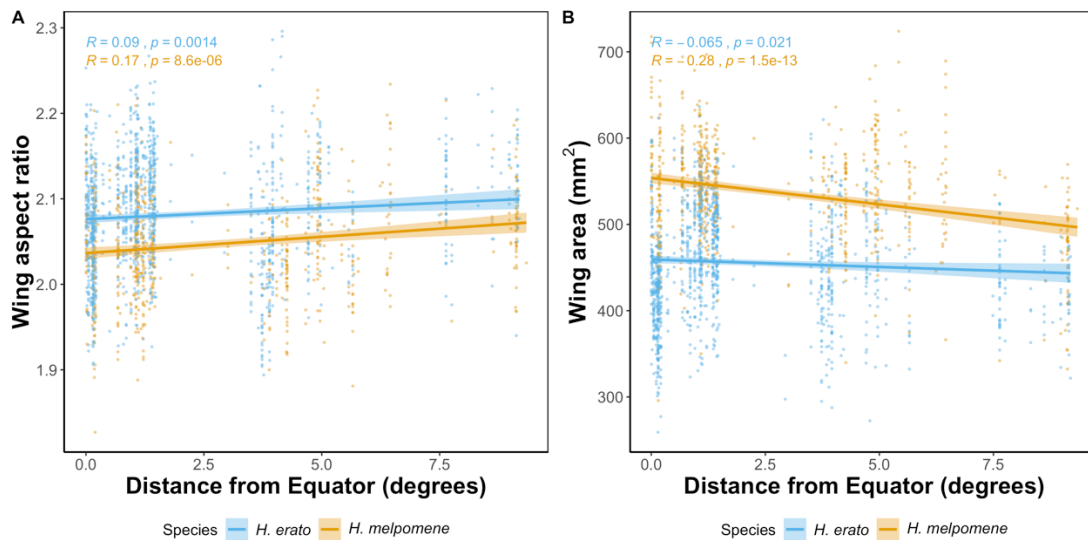

138  
 139  
 140  
 141  
 142  
 143  
 144  
 145

**Figure S11.** Species variation in raw wing aspect ratio (A) and wing area (B) in *H. erato* (blue) and *H. melpomene* (orange). Points represent individual values. Lines show best linear fit for significant effects. Shaded areas show confidence bands at 1 standard error. Pearson correlation coefficients and p-values are shown for each regression plotted.

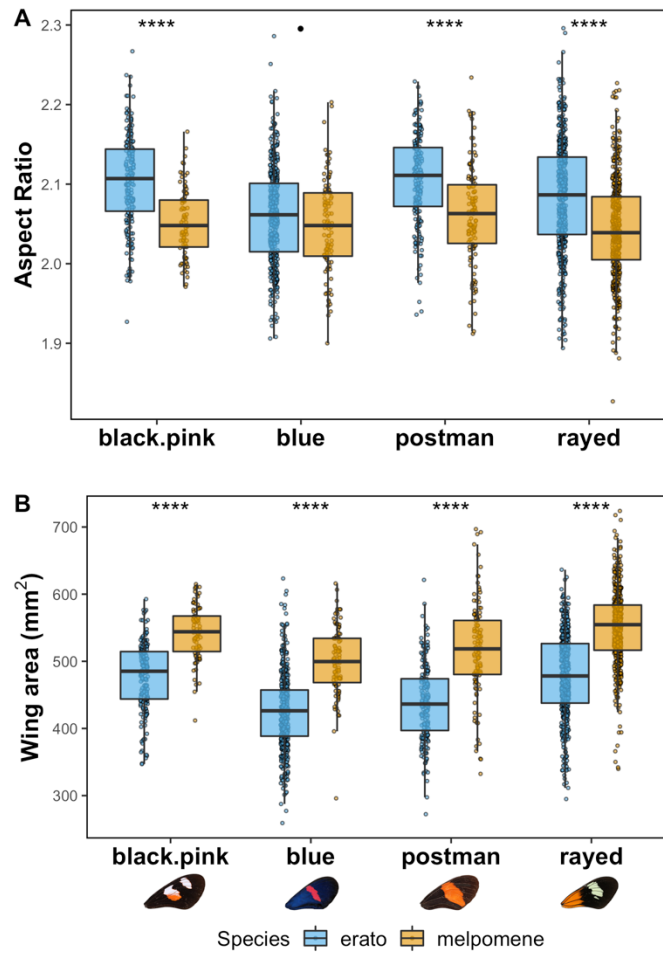

146  
 147  
 148  
 149  
 150  
 151  
 152  
 153  
 154

**Figure S12.** Wing aspect ratio (A) and area (B) variation across mimicy ring wing patterns of the two most abundant species, *H. erato* (blue) and *H. melpomene* (orange). Error bars represent 95% confidence intervals of the means. Stars represent significance levels of two sample t-tests between *H. erato* and *H. melpomene* wings for each mimicy ring ( $\bullet < 0.08$ ,  $* < 0.05$ ,  $** < 0.01$ ,  $*** < 0.001$ )

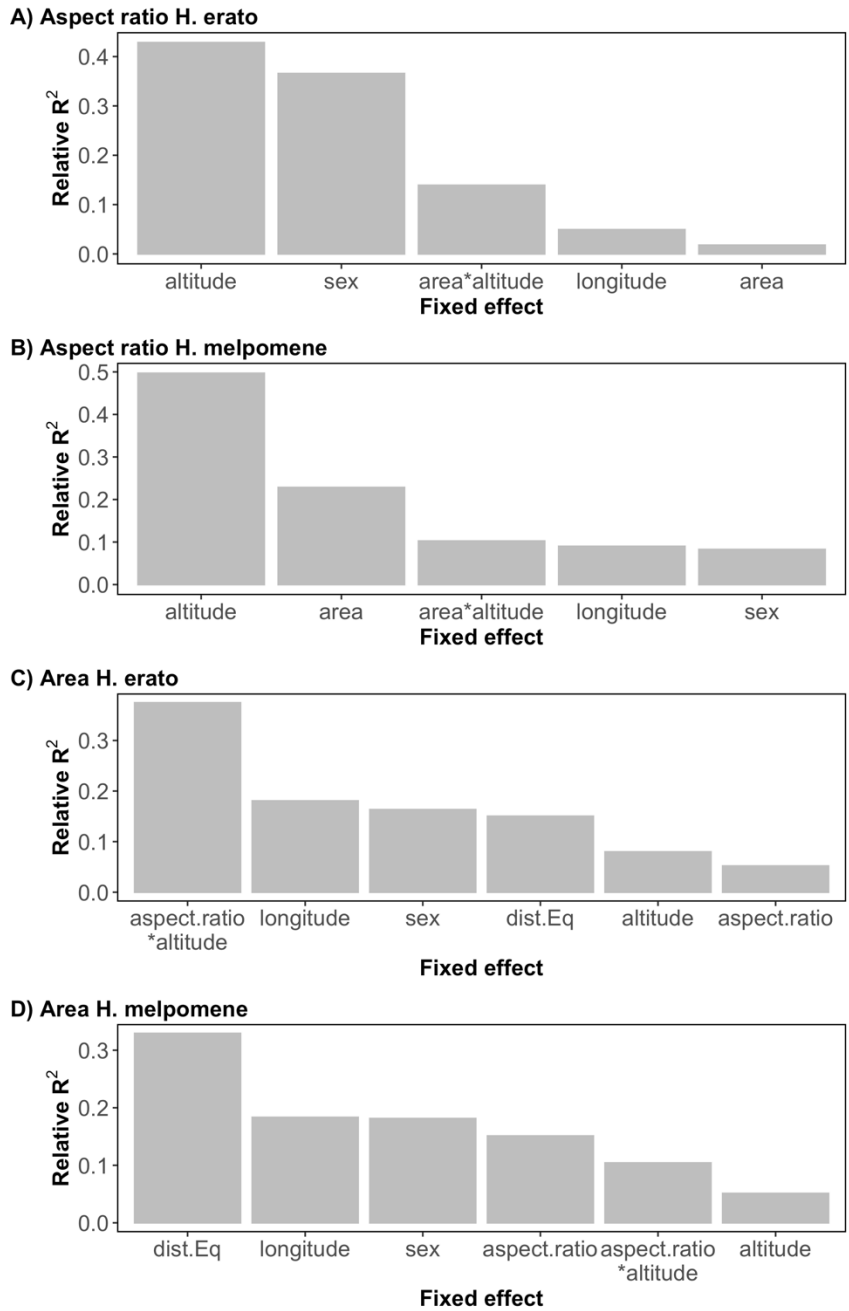

155  
 156  
 157  
 158  
 159  
 160

**Figure S13.** Relative importance of model predictors of within species variation wing aspect ratio (A, B) and wing area (C, B) in *H. erato* (A, C) and *H. melpomene* (B, D). Total model adjusted R<sup>2</sup> values are A) 0.13, B) 0.14, C) 0.19, D) 0.19.

161 **References**

162

163 Grömping, U. 2006. Relative Importance for Linear Regression in *R*: The Package

164 **relaimpo**. *Journal of Statistical Software*, doi: 10.18637/jss.v017.i01.

165 Keck, F., F. Rimet, A. Bouchez, and A. Franc. 2016. Phylosignal: An R package to

166 measure, test, and explore the phylogenetic signal. *Ecology and Evolution*,

167 doi: 10.1002/ece3.2051.

168 Kozak, K. M., N. Wahlberg, A. F. E. Neild, K. K. Dasmahapatra, J. Mallet, and C. D.

169 Jiggins. 2015. Multilocus species trees show the recent adaptive radiation of

170 the mimetic heliconius butterflies. *Systematic Biology* 64:505–524.

171
